# Supplementary material for: A flame retardant containing biomass-based polydopamine for high-performance rigid polyurethane foam
Source: Royal Society of Chemistry journal article supplement (doi:10.1039/d2nj00671e), 2022-01-01
Supplement: d2nj00671e1.pdf [file d2nj00671e1.pdf]

Electronic Supplementary Material (ESI) for New Journal of Chemistry.

This journal is © The Royal Society of Chemistry 2022

## Supplementary Information

### Flame retardant containing biomass-based polydopamine for high-performance rigid polyurethane foam

Xiaoyan Liu,<sup>a</sup> Yanlong Sui,<sup>b</sup> Pengyu Guo,<sup>c</sup> Rui Chen<sup>a</sup> and Jianxin Mu<sup>\*a</sup>

<sup>a</sup> Key Laboratory of High Performance Plastics, Ministry of Education, National & Local Joint Engineering Laboratory for Synthesis Technology of High Performance Polymer, College of Chemistry, Jilin University, Changchun 130012, P. R. China.

<sup>b</sup> School of Materials Science and Engineering, Jilin University, Changchun 130025, PR China.

<sup>c</sup> State Key Laboratory of Inorganic Synthesis and Preparative Chemistry, College of Chemistry, Jilin University, Changchun 130012, P. R. China.

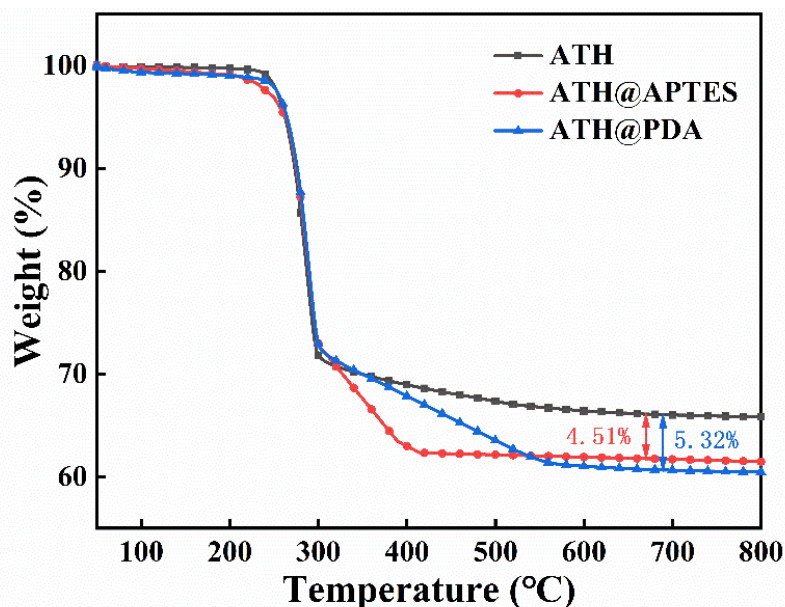

Fig. S1 The TGA curves of ATH, ATH@APTES, ATH@PDA.

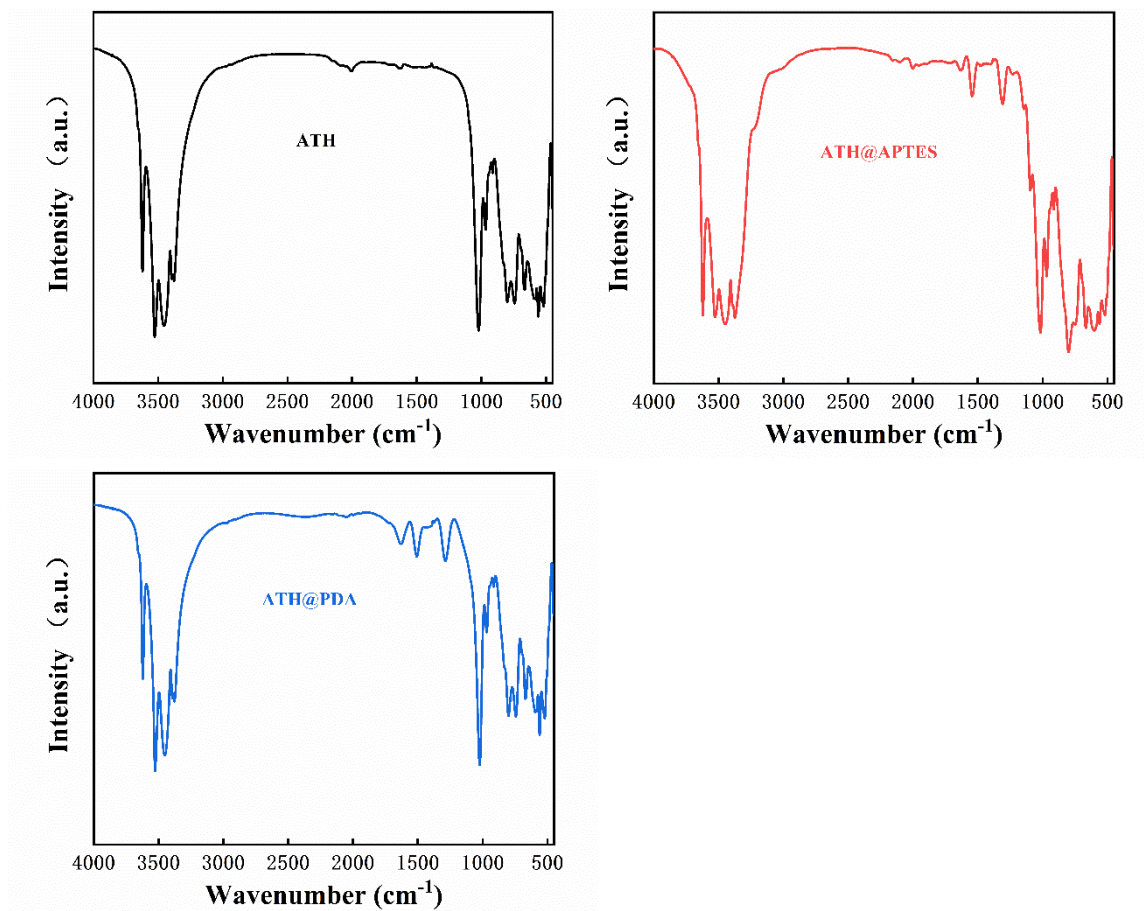

**Fig. S2** FTIR spectra of ATH, ATH@APTES, ATH@PDA.

**Table. S1** The proportions of aluminum, nitrogen and silicon elements in ATH, ATH@APTES, ATH@PDA

| Samples   | Al (wt%) | N (wt%) | Si (wt%) |
|-----------|----------|---------|----------|
| ATH       | 34.62    | -       | -        |
| ATH@APTES | 32.25    | 0.47    | 0.94     |
| ATH@PDA   | 31.82    | 0.77    | -        |
